# Supplementary material
Source: publisher site journal article supplement (http://kjim.org/upload/media/kjim-2022-129-suppl4.pdf)
Supplement: Supplementary file 1 [file kjim-2022-129-suppl4.pdf]

**Supplementary Table 4. Comparison of the mean RSV for “cloud” in Google Trends in Korea between different stages of the COVID-19 pandemic**

| Variable          | Median (range) of RSV |                     |                     |                     |                     | p value |
|-------------------|-----------------------|---------------------|---------------------|---------------------|---------------------|---------|
|                   | Stage 1               | Stage 2             | Stage 3             | Stage 4             | Stage 5             |         |
| Seoul             | 77.5<br>(51.8–96.0)   | 79.1<br>(59.6–91.0) | 67.0<br>(40.3–74.0) | 62.5<br>(50.6–72.0) | 66.0<br>(49.8–69.0) | <0.001  |
| Busan             | 48.0<br>(16.1–77.4)   | 51.7<br>(33.8–77.1) | 42.8<br>(14.7–56.9) | 37.8<br>(17.8–56.1) | 41.5<br>(32.2–53.3) | <0.001  |
| Daegu             | 58.3<br>(32.4–87.4)   | 54.2<br>(31.7–83.3) | 47.5<br>(0–63.0)    | 41.8<br>(20.2–61.0) | 35.9<br>(12.7–45.5) | <0.001  |
| Incheon           | 54.2<br>(37.1–83.7)   | 56.2<br>(38.5–74.6) | 38.4<br>(18.6–69.8) | 35.9<br>(18.9–54.0) | 38.4<br>(16.6–48.8) | <0.001  |
| Gwangju           | 53.5<br>(21.7–88.0)   | 54.6<br>(16.5–77.0) | 37.4<br>(0–67.3)    | 37.5<br>(14.3–68.0) | 44.9<br>(26.6–67.0) | 0.002   |
| Daejeon           | 54.0<br>(30.0–91.0)   | 60.7<br>(30.4–85.1) | 45.6<br>(0–74.1)    | 35.2<br>(24.6–78.0) | 41.0<br>(23.1–57.6) | <0.001  |
| Ulsan             | 49.3<br>(21.9–87.0)   | 43.6<br>(21.9–69.7) | 33.8<br>(5.0–70.2)  | 31.9<br>(8.8–67.9)  | 35.9<br>(17.3–65.0) | 0.005   |
| Gyeonggi-do       | 57.9<br>(37.8–76.5)   | 61.9<br>(46.2–83.7) | 48.2<br>(19.2–67.7) | 42.8<br>(35.8–55.3) | 48.3<br>(36.0–55.1) | <0.001  |
| Gangwon-do        | 46.5<br>(18.9–100)    | 58.0<br>(19.5–82.0) | 42.9<br>(0–78.0)    | 33.1<br>(16.9–57.6) | 39.1<br>(12.2–64.9) | 0.002   |
| Chungcheongbuk-do | 46.5<br>(14.6–69.9)   | 41.5<br>(31.1–61.9) | 33.9<br>(22.0–61.2) | 36.0<br>(18.6–58.0) | 36.0<br>(15.2–70.0) | 0.003   |
| Chungcheongnam-do | 50.8<br>(28.7–71.3)   | 47.1<br>(27.0–75.7) | 36.6<br>(16.9–72.0) | 32.7<br>(17.7–63.9) | 32.5<br>(21.8–50.9) | <0.001  |
| Jeollabuk-do      | 42.5<br>(16.1–76.4)   | 39.6<br>(18.6–64.6) | 33.8<br>(23.7–64.0) | 28.6<br>(14.8–58.9) | 29.9<br>(17.7–46.9) | 0.001   |
| Jeollanam-do      | 46.8<br>(18.9–83.0)   | 46.8<br>(23.2–80.4) | 33.9<br>(0–50.4)    | 32.5<br>(9.8–56.1)  | 41.0<br>(17.9–72.0) | 0.003   |
| Gyeongsanbuk-do   | 39.9<br>(0–86.0)      | 39.6<br>(21.0–69.7) | 32.2<br>(18.7–48.2) | 27.5<br>(11.5–44.1) | 36.0<br>(18.6–46.2) | <0.001  |
| Gyeongsangnam-do  | 45.6<br>(22.4–75.6)   | 41.1<br>(19.3–60.0) | 28.4<br>(17.0–59.0) | 28.4<br>(16.4–54.7) | 30.2<br>(18.7–50.4) | <0.001  |
| Jeju-do           | 46.6<br>(0–86.0)      | 48.2<br>(18.6–84.0) | 36.7<br>(0–67.2)    | 33.7<br>(0–70.3)    | 44.2<br>(26.1–63.0) | 0.075   |

RSV, relative search volume; COVID-19, coronavirus disease 2019.
